# Supplementary material for: The interfacial effect induced by rare earth oxide in boosting the conversion of CO2 to formate
Source: Royal Society of Chemistry journal article supplement (doi:10.1039/d2ee01710e), 2022-01-01
Supplement: d2ee01710e1.pdf [file d2ee01710e1.pdf]

## Supporting Information

### Interfacial Effect induced by Rare Earth Oxide in Boosting Conversion of CO<sub>2</sub> to Formate

*Lianpeng Song, Zhong Liang, Mingzi Sun, Bolong Huang\*, Yaping Du\**

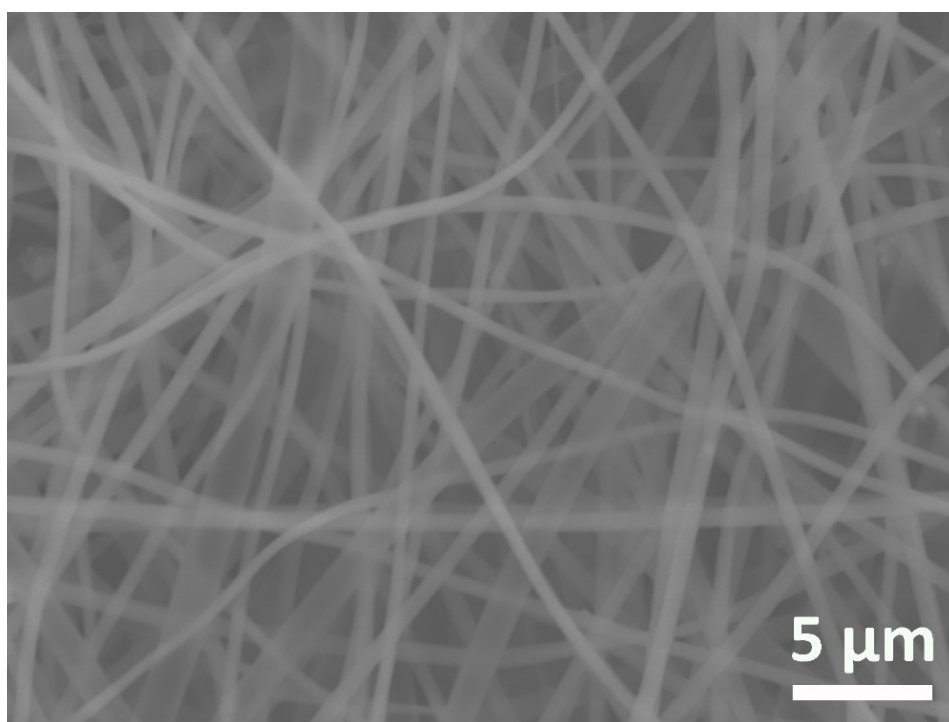

**Fig. S1** SEM image of as-spun fiber of CeO<sub>2</sub>/Bi<sub>3</sub>NbO<sub>7</sub>.

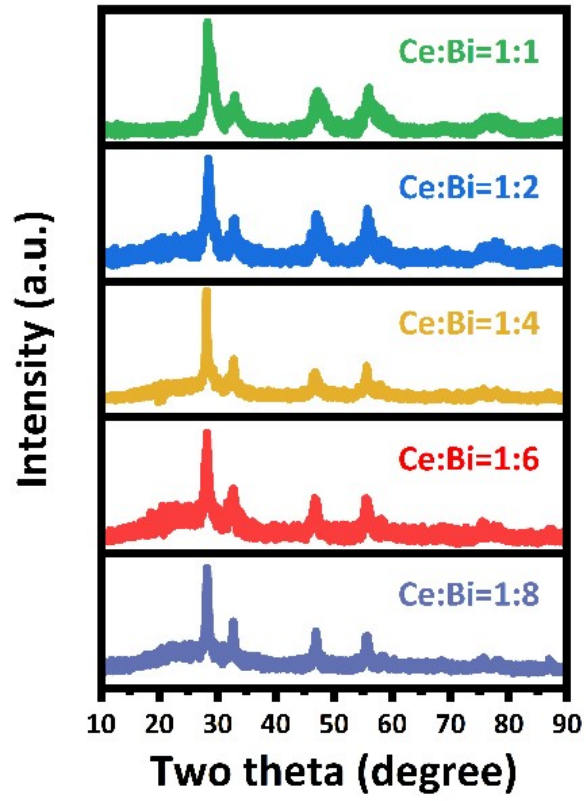

Fig. S2 XRD pattern comparison of CeO<sub>2</sub>/Bi<sub>3</sub>NbO<sub>7</sub> with different Ce: Bi ratios.

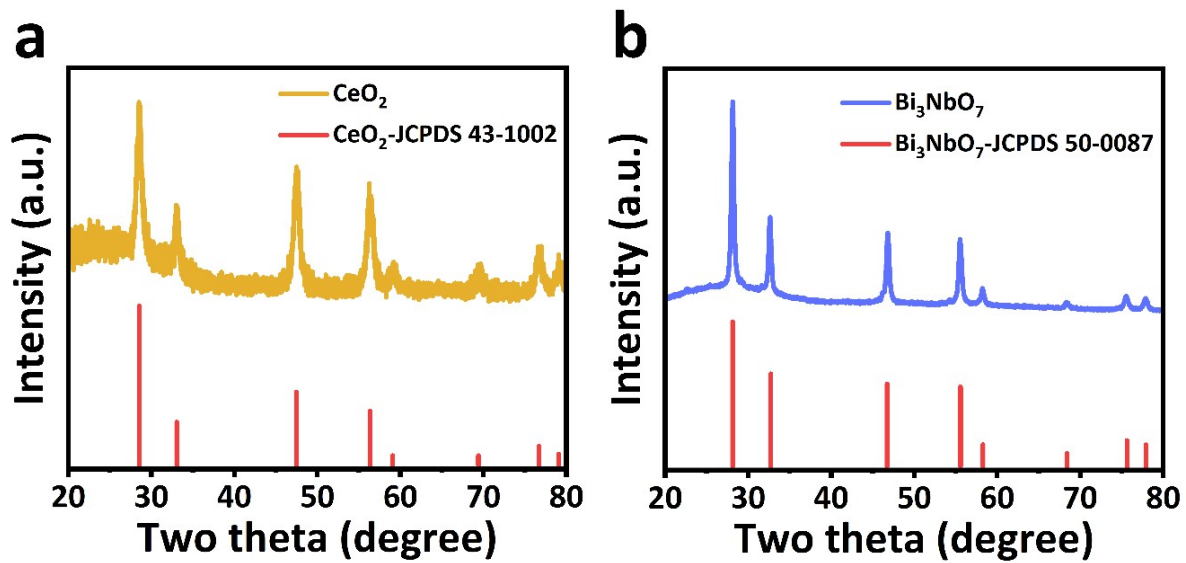

Fig. S3 a XRD pattern of  $\text{CeO}_2$  and b  $\text{Bi}_3\text{NbO}_7$ .

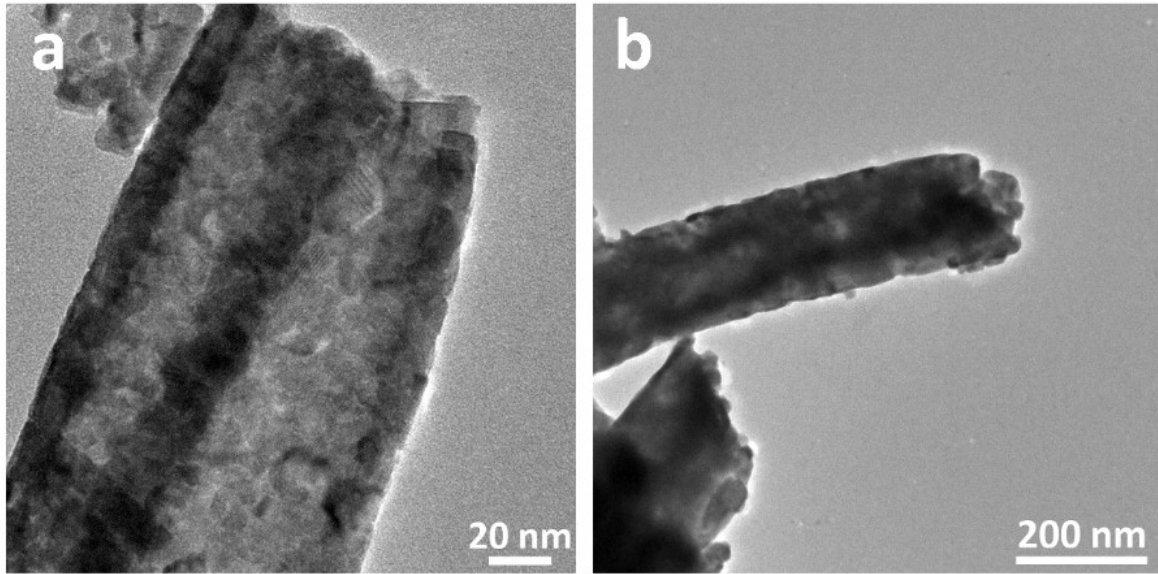

**Fig. S4** Morphologic characterization of **a** CeO<sub>2</sub> and **b** Bi<sub>3</sub>NbO<sub>7</sub>

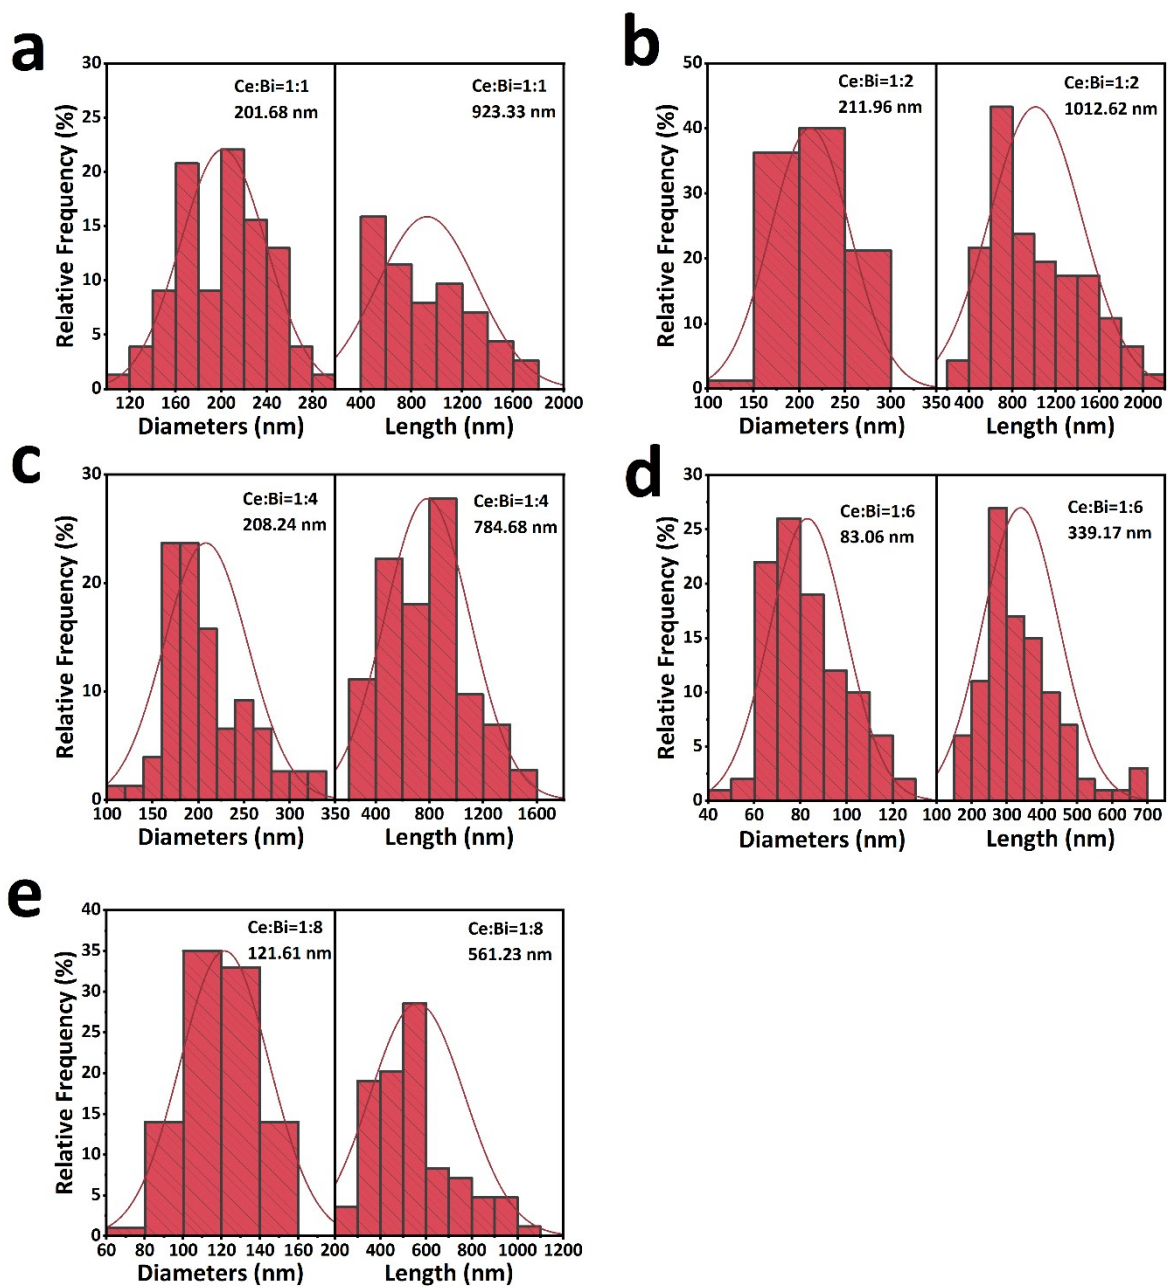

**Fig. S5** The comparisons of the size distributions (diameters and length) for  $\text{CeO}_2/\text{Bi}_3\text{NbO}_7$  with different ratios.

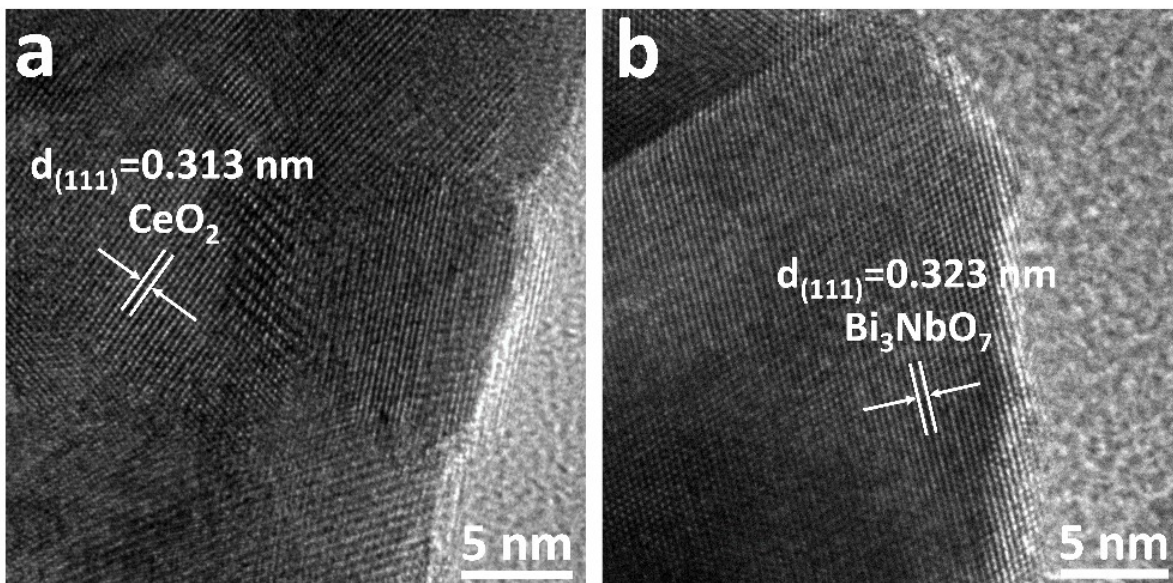

**Fig. S6** HRTEM images of **a**  $\text{CeO}_2$  and **b**  $\text{Bi}_3\text{NbO}_7$ .



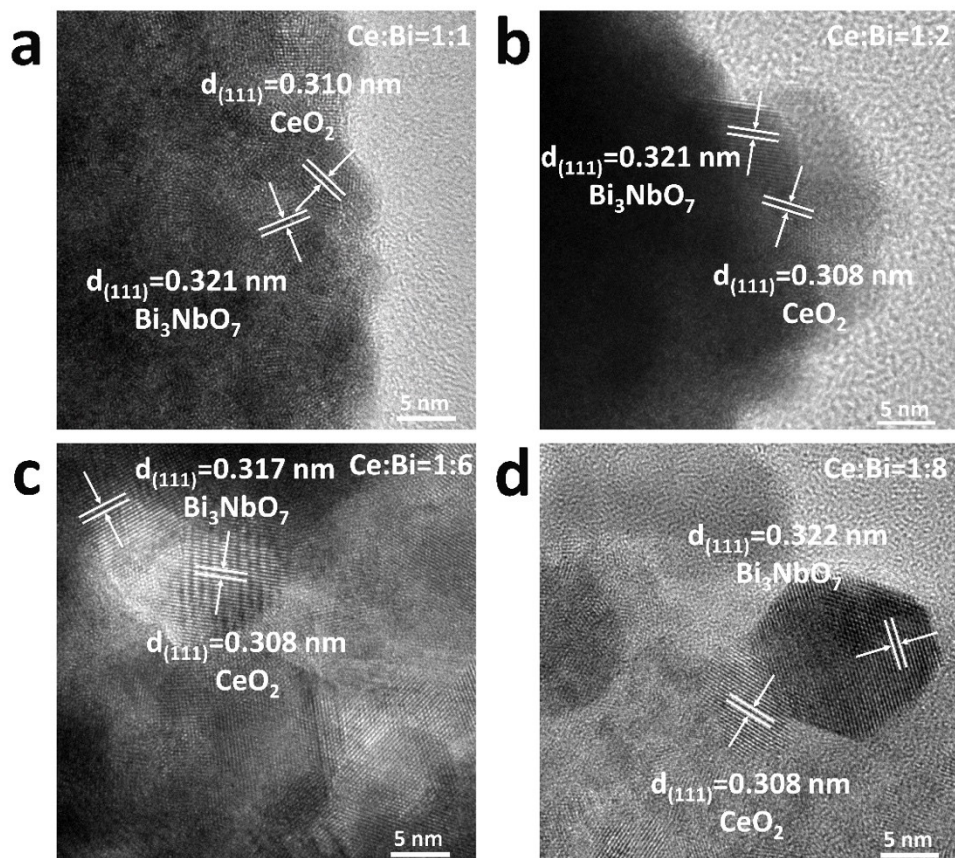

**Fig. S7** HRTEM of the interfaces in  $\text{CeO}_2/\text{Bi}_3\text{NbO}_7$  with different Ce: Bi ratios.

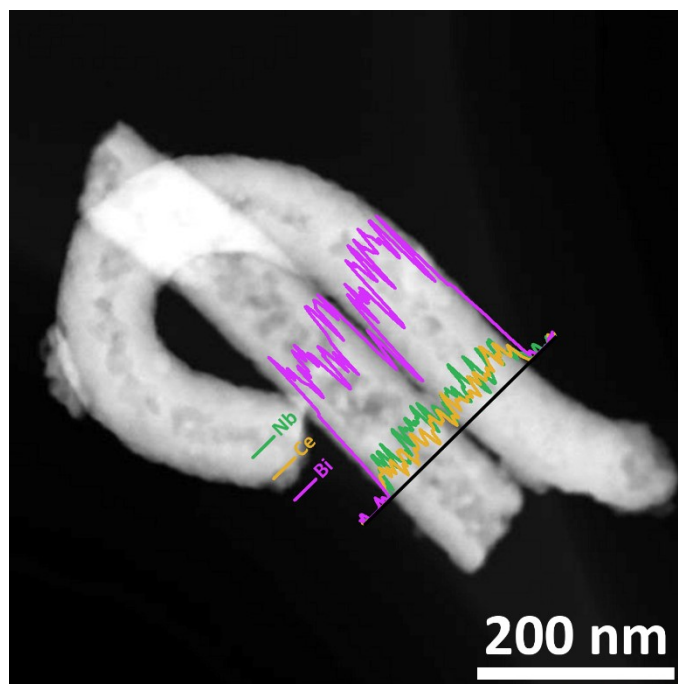

**Fig. S8** The line scan of different elements of  $\text{CeO}_2/\text{Bi}_3\text{NbO}_7$ .



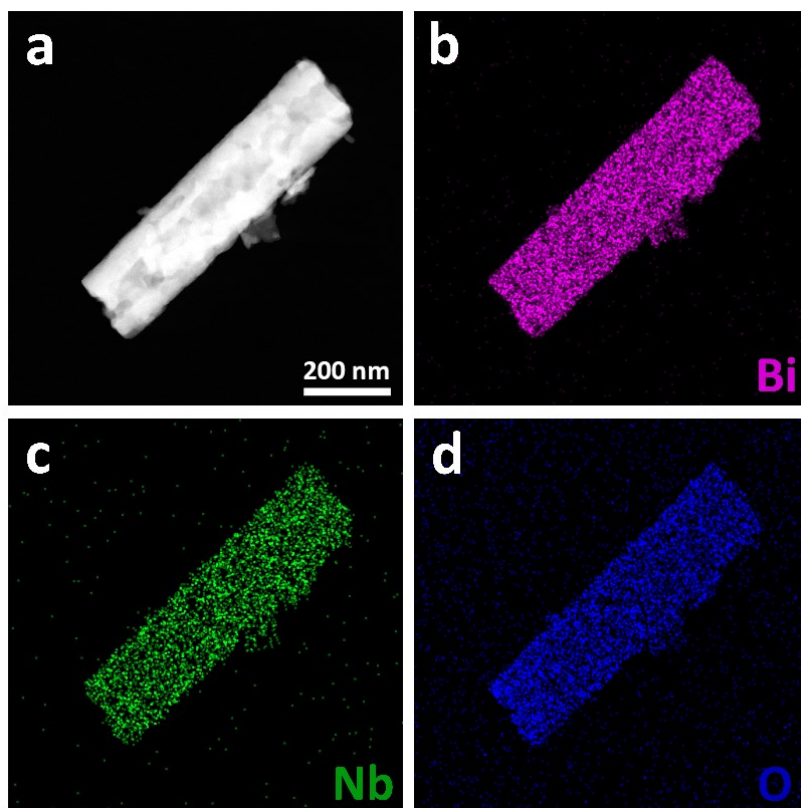

**Fig. S9 a-d** Corresponding elemental mapping images of  $\text{Bi}_3\text{NbO}_7$ .

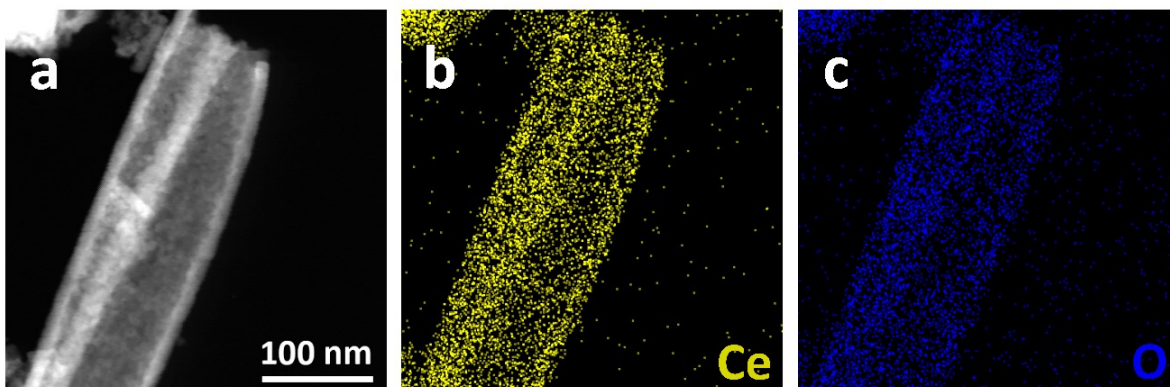

**Fig. S10** a-c Corresponding elemental mapping images of  $\text{CeO}_2$ .

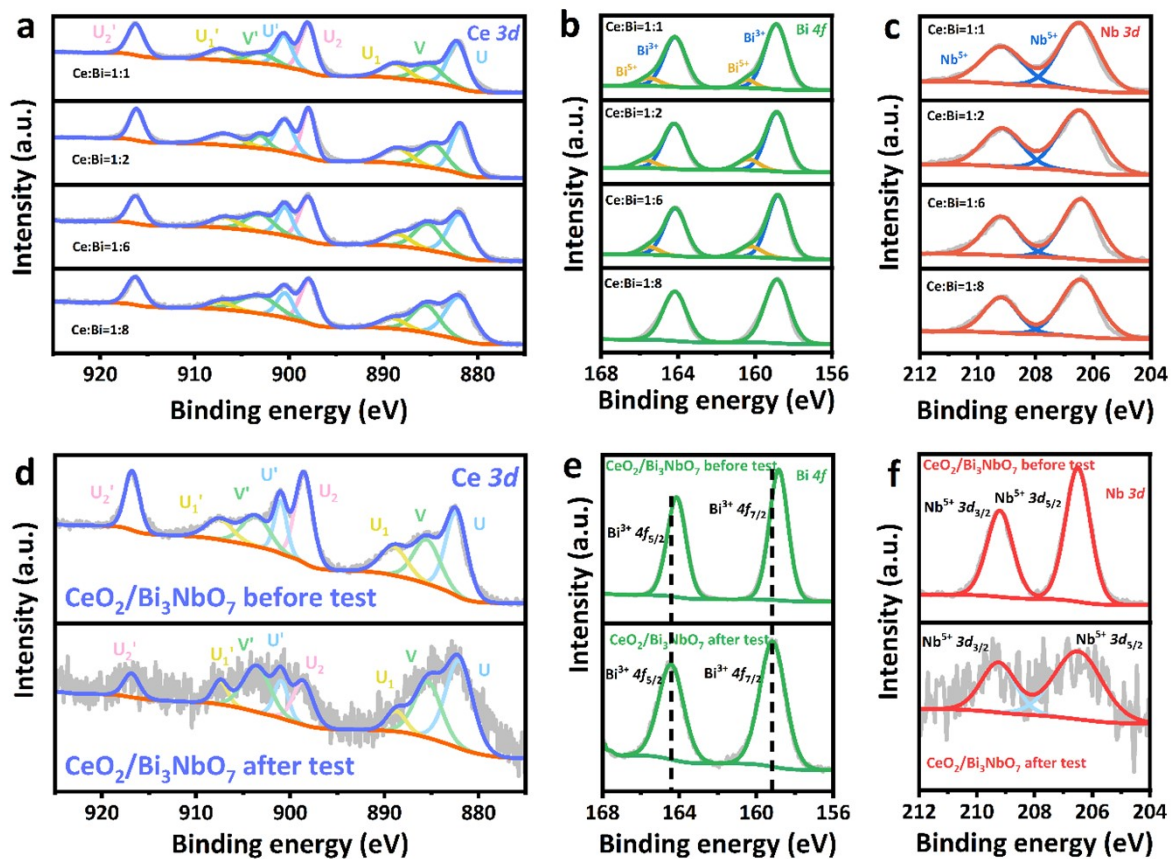

**Fig. S11.** a-c XPS of  $\text{CeO}_2/\text{Bi}_3\text{NbO}_7$  with different ratios. d-f XPS of  $\text{CeO}_2/\text{Bi}_3\text{NbO}_7$  before and after tests.

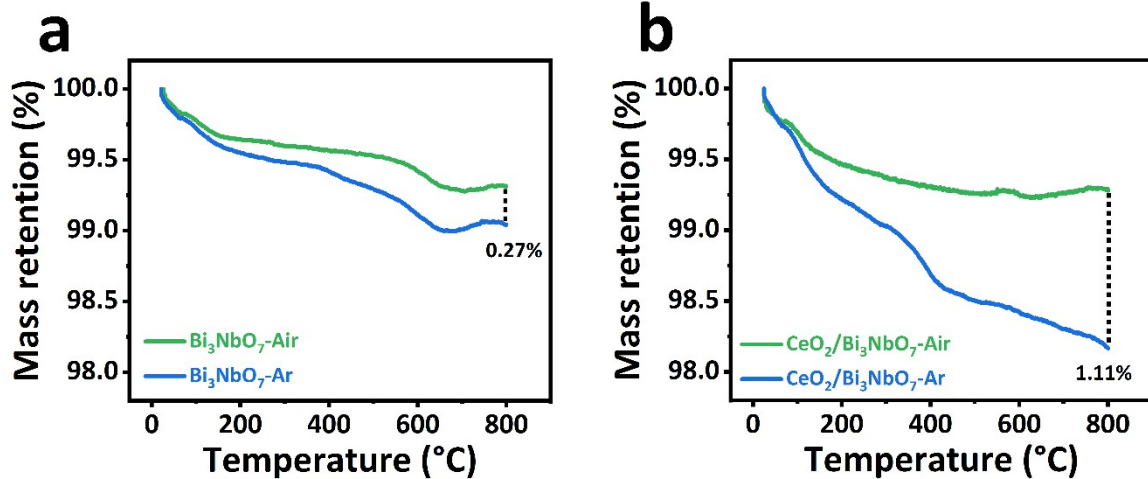

**Fig. S12. a-b** TGA analysis of Bi<sub>3</sub>NbO<sub>7</sub> and CeO<sub>2</sub>/Bi<sub>3</sub>NbO<sub>7</sub> in air and argon atmosphere. (Flow of 100 mL/min and a ramping rate of 10 °C/min). The concentration of oxygen vacancies was calculated from the difference in weight decrease between the two TGA traces.

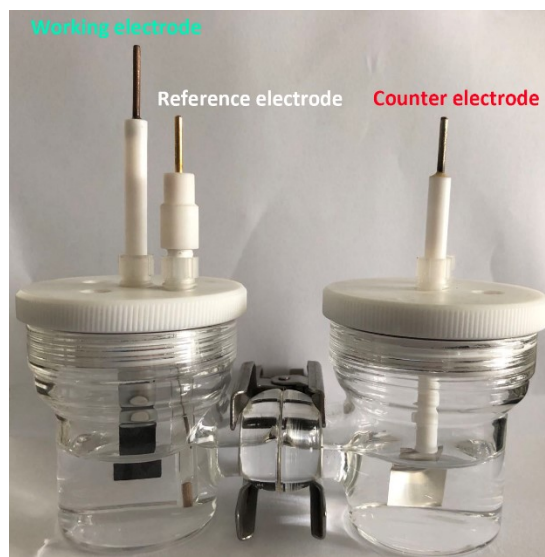

**Fig. S13** H-type cell for electrocatalytic carbon dioxide reduction.

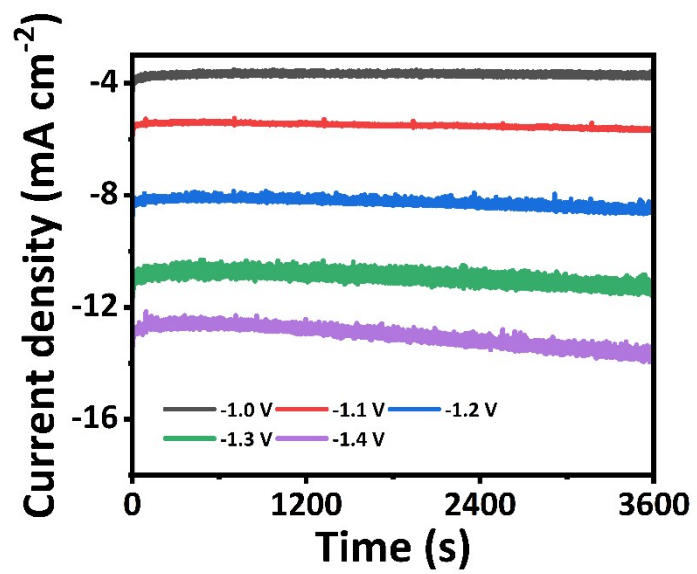

**Fig. S14** Chronoamperometric curves of CeO<sub>2</sub>/Bi<sub>3</sub>NbO<sub>7</sub> (1: 4) at different working potentials.



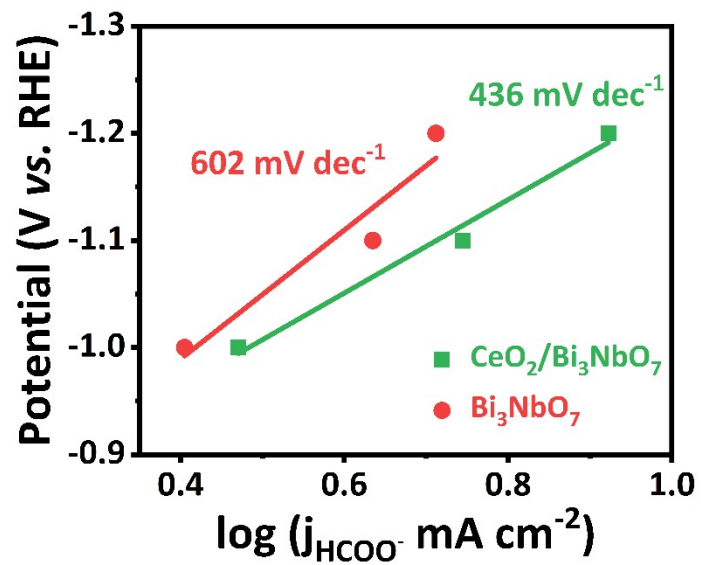

Fig. S15 Tafel plot of  $\text{Bi}_3\text{NbO}_7$  and  $\text{CeO}_2/\text{Bi}_3\text{NbO}_7$ .

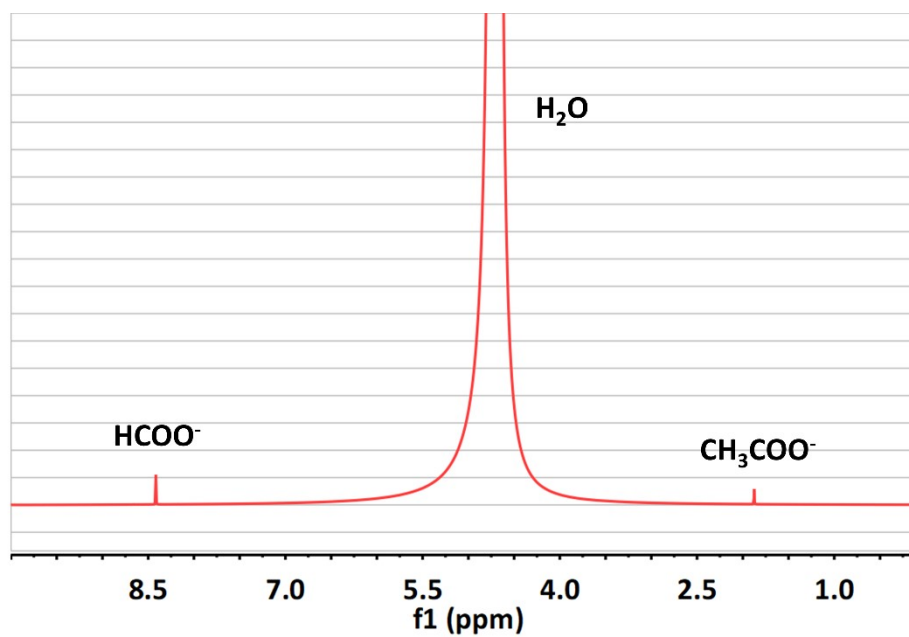

**Fig. S16** Representative NMR spectrum of CeO<sub>2</sub>/Bi<sub>3</sub>NbO<sub>7</sub> after electrolysis at -1.2 V versus RHE for 6 h.

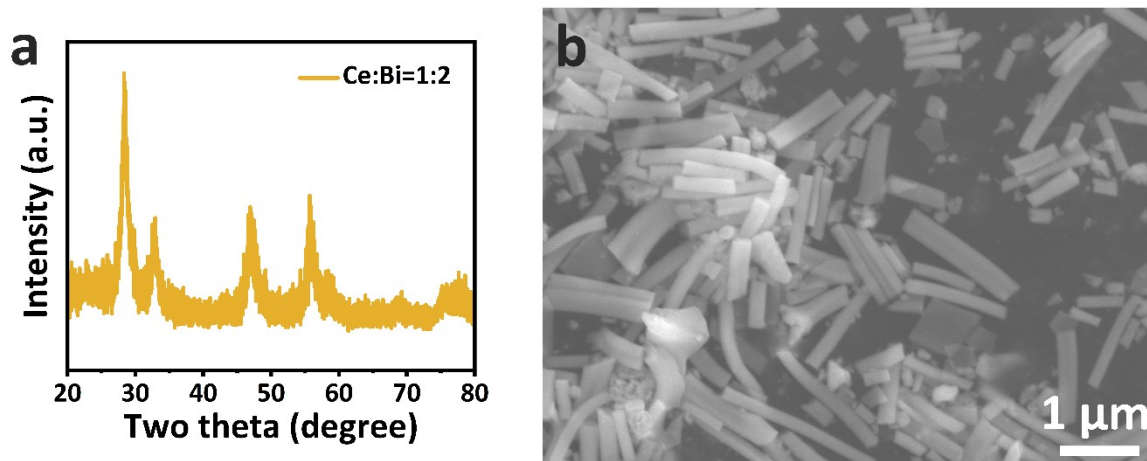

Fig. S17 a XRD pattern, b SEM image of the complex with a molar ratio of Ce and Bi of 2.

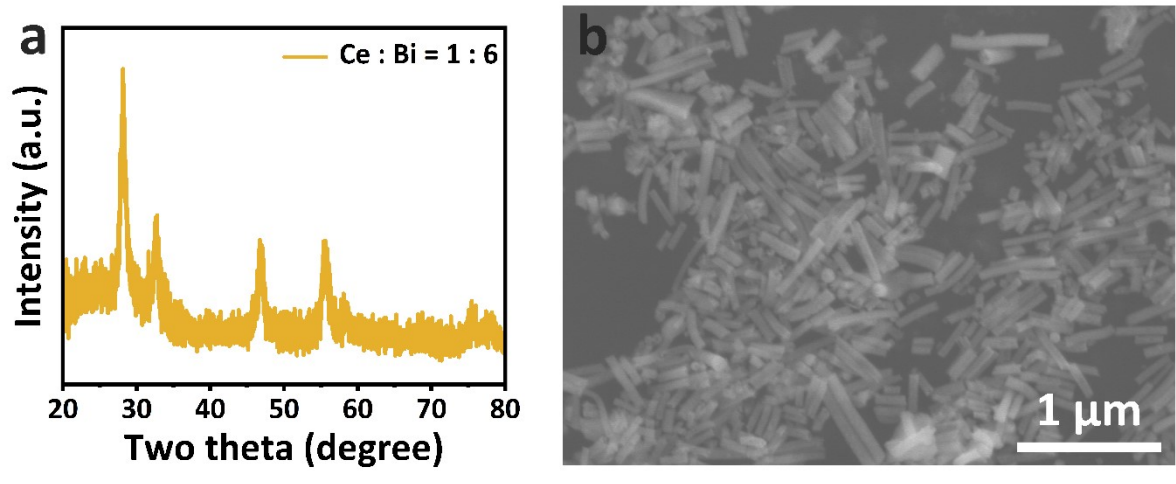

Fig. S18 a XRD pattern, b SEM image of complex with a molar ratio of Ce and Bi of 6.

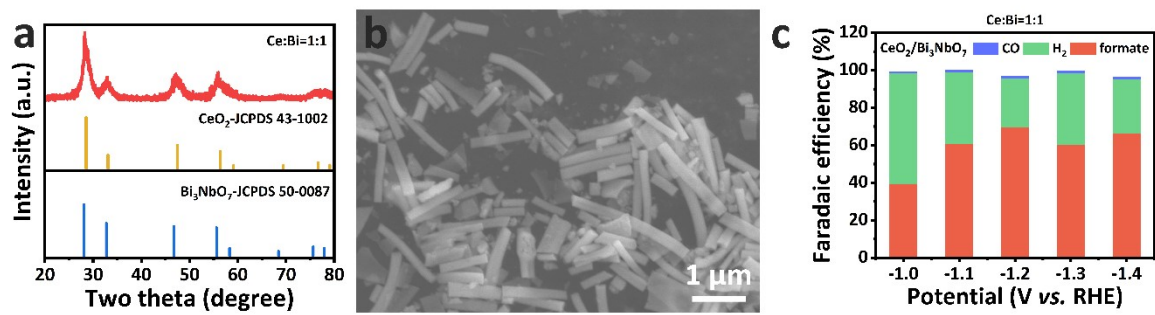

**Fig. S19** **a** XRD pattern, **b** SEM image and **c** FE of formate, CO<sub>2</sub> and H<sub>2</sub> of CeO<sub>2</sub>/Bi<sub>3</sub>NbO<sub>7</sub> (Ce/Bi=1/1) at selected voltages.

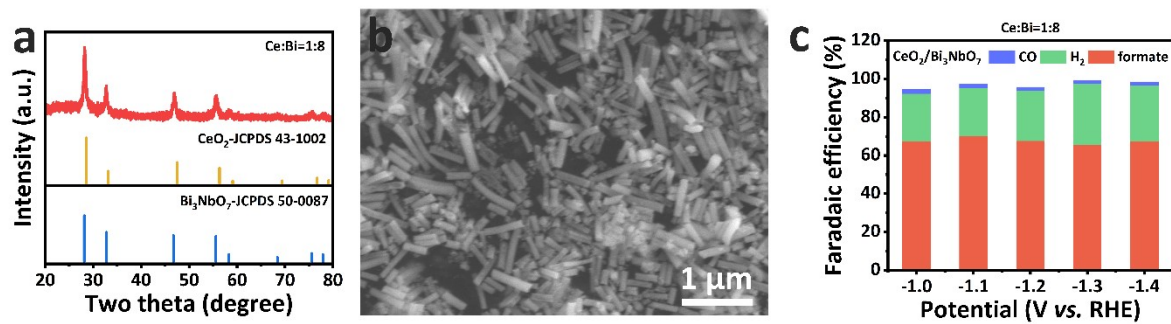

**Fig. S20** **a** XRD pattern, **b** SEM image and **c** FE of formate, CO<sub>2</sub> and H<sub>2</sub> of CeO<sub>2</sub>/Bi<sub>3</sub>NbO<sub>7</sub> (Ce/Bi=1/8) at selected voltages.



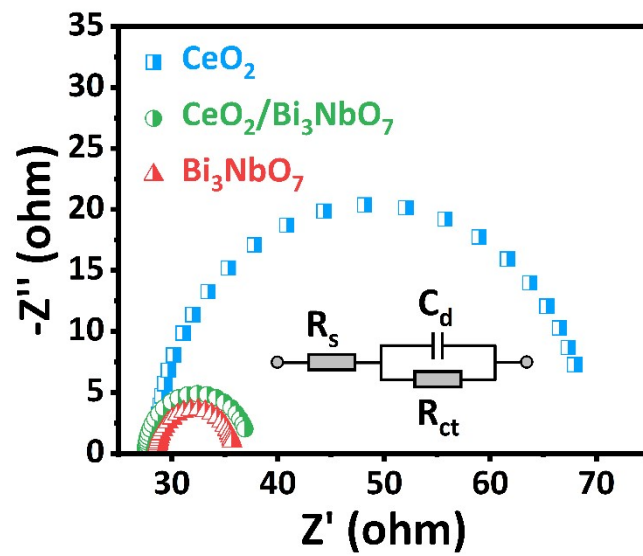

**Fig. S21** Electrochemical impedance spectra (EIS) of  $\text{CeO}_2$ ,  $\text{Bi}_3\text{NbO}_7$  and  $\text{CeO}_2/\text{Bi}_3\text{NbO}_7$  at -1.2 V versus RHE, after fitting.

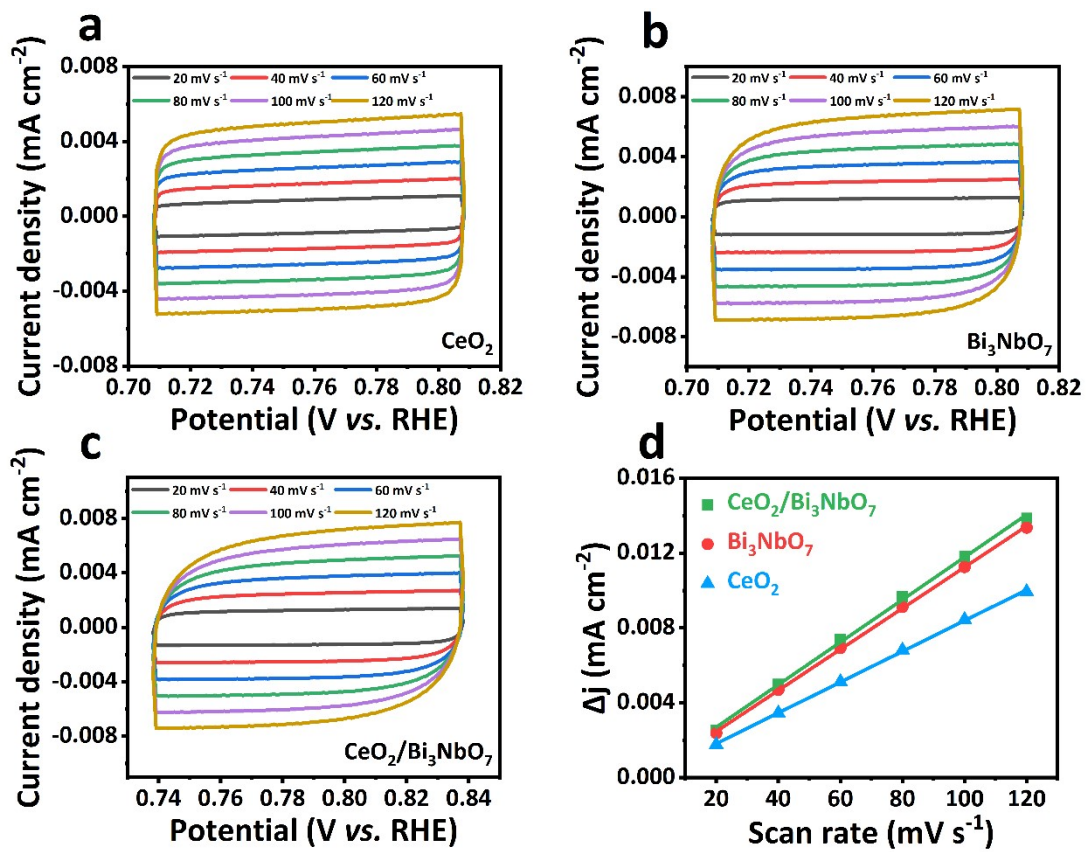

**Fig. S22** Cyclic voltammetry curves of a  $\text{CeO}_2$ , b  $\text{Bi}_3\text{NbO}_7$ , c  $\text{CeO}_2/\text{Bi}_3\text{NbO}_7$  and d different samples plotted against scan rate.

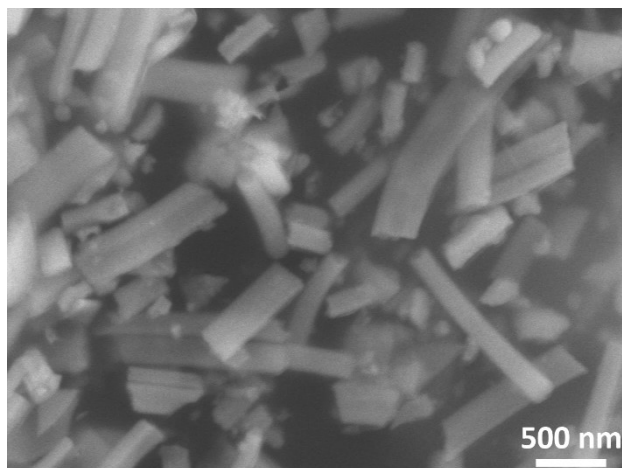

**Fig. S23** SEM images of the  $\text{CeO}_2/\text{Bi}_3\text{NbO}_7$  dispersed on carbon paper after 12 h stability test.

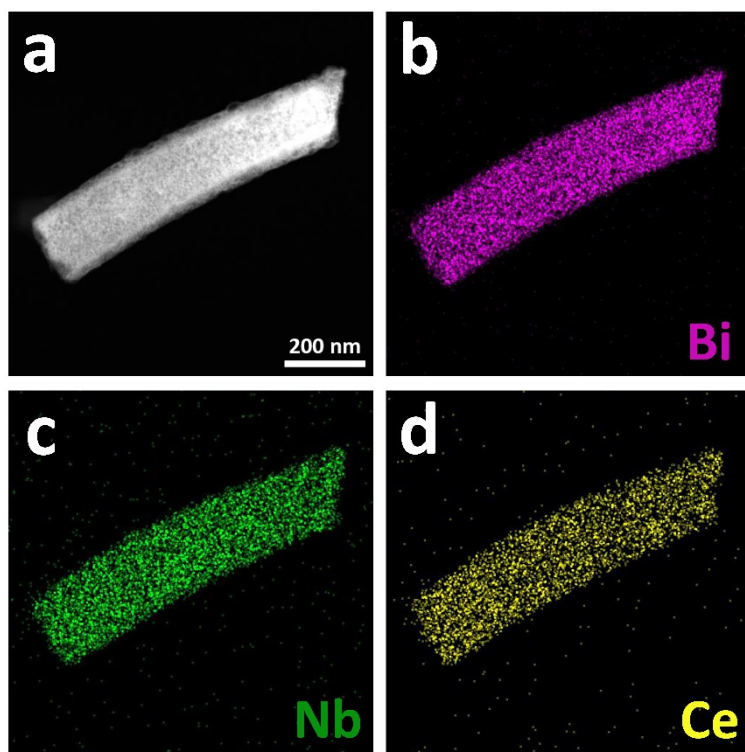

**Fig. S24 a-d** Corresponding elemental mapping images of  $\text{CeO}_2/\text{Bi}_3\text{NbO}_7$  after stability test.

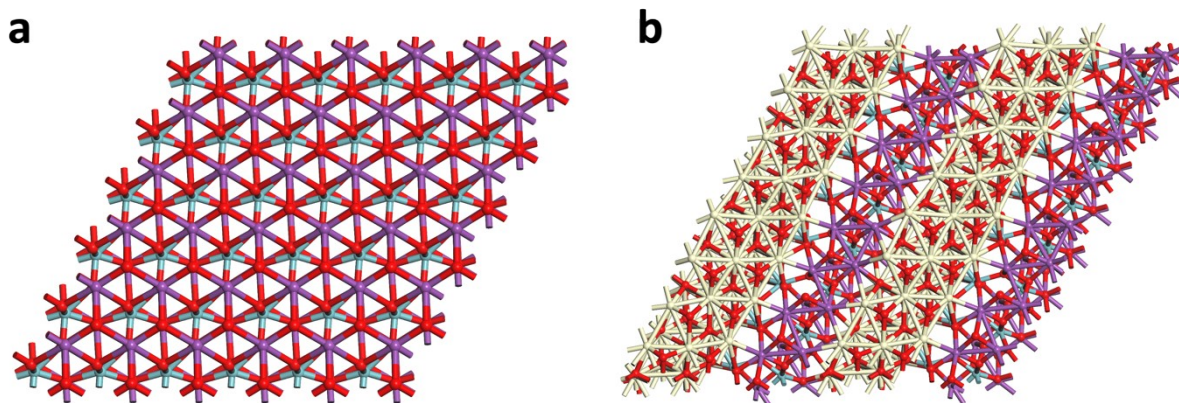

**Fig. S25** The DFT calculation models of (a)  $\text{Bi}_3\text{NbO}_7$  and (b)  $\text{CeO}_2/\text{Bi}_3\text{NbO}_7$  after relaxation.

**Table S1.** The morphology analysis of different CeO<sub>2</sub>/Bi<sub>3</sub>NbO<sub>7</sub> samples.

| <b>Ce: Bi Ratio Sample</b> | <b>diameters (nm)</b> | <b>Length (nm)</b> |
|----------------------------|-----------------------|--------------------|
| 1:1                        | 201.68                | 923.33             |
| 1:2                        | 211.96                | 1012.62            |
| 1:4                        | 208.24                | 784.68             |
| 1:6                        | 83.06                 | 339.17             |
| 1:8                        | 121.61                | 561.23             |



**Table S2.** The composition ratios of different CeO<sub>2</sub>/Bi<sub>3</sub>NbO<sub>7</sub> samples.

| <b>Ce: Bi Ratio<br/>Sample</b> | <b>Ce Ratio (%)</b> | <b>Bi Ratio (%)</b> | <b>Nb Ratio (%)</b> |
|--------------------------------|---------------------|---------------------|---------------------|
| 1:1                            | 41.01               | 42.23               | 16.76               |
| 1:2                            | 26.26               | 55.52               | 18.22               |
| 1:4                            | 17.61               | 60.06               | 22.33               |
| 1:6                            | 13.11               | 63.48               | 23.41               |
| 1:8                            | 9.22                | 72.67               | 18.11               |

**Table S3.** Performance comparison of CeO<sub>2</sub>/Bi<sub>3</sub>NbO<sub>7</sub> with other Bi-based electrocatalysts reported recently.

| Catalysts               | Electrolyte                                        | Formate FE            | j <sub>formate</sub>      | Ref.      |
|-------------------------|----------------------------------------------------|-----------------------|---------------------------|-----------|
| 2.0 M KHCO <sub>3</sub> | Bi@Sn NPs                                          | 92%@-1.0 V vs. RHE    | 230 mA cm <sup>-2</sup>   | 1         |
| 0.1 M KHCO <sub>3</sub> | Ag - Bi                                            | 88.4%@-1.2 V vs. RHE  | 18.74 mA cm <sup>-2</sup> | 2         |
| 0.1 M KHCO <sub>3</sub> | Bi <sub>2</sub> O <sub>2</sub> CO <sub>3</sub>     | 83%@-0.59 V vs. RHE   | 0.17 mA cm <sup>-2</sup>  | 3         |
| 0.1 M KHCO <sub>3</sub> | Bi <sub>52</sub> Sn <sub>46</sub> In <sub>2</sub>  | 82%@-1.2 V vs. RHE    | 25 mA cm <sup>-2</sup>    | 4         |
| 0.1 M HNO <sub>3</sub>  | MWCNT@CeO <sub>2</sub>                             | 65%@-0.22 V vs. RHE   | 0.325 mA cm <sup>-2</sup> | 5         |
| 0.1 M HNO <sub>3</sub>  | Bi <sub>x</sub> Sn <sub>1-x</sub>                  | 78%@-1.1 V vs. RHE    | 9.36 mA cm <sup>-2</sup>  | 6         |
| 0.1 M KHCO <sub>3</sub> | CeO <sub>2</sub> /Bi <sub>3</sub> NbO <sub>7</sub> | 83.13%@-1.4 V vs. RHE | 14.29 mA cm <sup>-2</sup> | This work |

## Reference

1. Xing, Y.; Kong, X.; Guo, X.; Liu, Y.; Li, Q.; Zhang, Y.; Sheng, Y.; Yang, X.; Geng, Z.; Zeng, J., Bi@Sn Core-Shell Structure with Compressive Strain Boosts the Electroreduction of CO<sub>2</sub> into Formic Acid. *Adv. Sci.* 2020, 7 (22), 1902989.
2. Zhou, X.; Lu, X.; Yu, T.; Wang, H.; Qian, L.; Lei, P.; Yu, Y.; Liu, L.; Xia, S.; Fang, J., Conformal Shell Amorphization of Nanoporous Ag-Bi for Efficient Formate Generation. *ACS Appl. Mater. Interfaces* 2020, 12 (28), 31319-31326.
3. Lv, W.; Bei, J.; Zhang, R.; Wang, W.; Kong, F.; Wang, L.; Wang, W., Bi<sub>2</sub>O<sub>2</sub>CO<sub>3</sub> Nanosheets as Electrocatalysts for Selective Reduction of CO<sub>2</sub> to Formate at Low Overpotential. *ACS Omega* 2017, 2 (6), 2561-2567.
4. Allieux, F. M.; Merhebi, S.; Ghasemian, M. B.; Tang, J.; Merenda, A.; Abbasi, R.; Mayyas, M.; Daeneke, T.; O'Mullane, A. P.; Daiyan, R.; Amal, R.; Kalantar-Zadeh, K., Bi-Sn Catalytic Foam Governed by Nanometallurgy of Liquid Metals. *Nano Lett* 2020, 20 (6), 4403-4409.
5. Valenti, G.; Melchionna, M.; Montini, T.; Boni, A.; Nasi, L.; Fonda, E.; Criado, A.; Zitolo, A.; Voci, S.; Bertoni, G.; Bonchio, M.; Fornasiero, P.; Paolucci, F.; Prato, M., Water-Mediated ElectroHydrogenation of CO<sub>2</sub> at Near-Equilibrium Potential by Carbon Nanotubes/Cerium Dioxide Nanohybrids. *ACS Appl. Energy Mater.* 2020, 3 (9), 8509-8518.
6. Tang, J.; Daiyan, R.; Ghasemian, M. B.; Idrus-Saidi, S. A.; Zavabeti, A.; Daeneke, T.; Yang, J.; Koshy, P.; Cheong, S.; Tilley, R. D.; Kaner, R. B.; Amal, R.; Kalantar-Zadeh, K., Advantages of eutectic alloys for creating catalysts in the realm of nanotechnology-enabled metallurgy. *Nat. Commun.* 2019, 10 (1), 4645.
